# Supplementary material for: Porous MnFe2O4-decorated PB nanocomposites: a new theranostic agent for boosted T1/T2 MRI-guided synergistic photothermal/magnetic hyperthermia
Source: Royal Society of Chemistry journal article supplement (doi:10.1039/c8ra02946f), 2018-01-01
Supplement: c8ra02946f1.pdf [file c8ra02946f1.pdf]

### Supporting Information

## Porous MnFe<sub>2</sub>O<sub>4</sub>-Decorated PB Nanocomposites: a New Theranostic Agent for Boosted T<sub>1</sub>/T<sub>2</sub> MRI-Guided Synergistic Photothermal/Magnetic Hyperthermia

Xi Zhou,<sup>a</sup> Xiaolin Lv,<sup>a</sup> Wen Zhao,<sup>a</sup> Tiantian Zhou,<sup>b</sup> Shupeng Zhang,<sup>a</sup> Zhan Shi,<sup>c</sup> Shefang Ye<sup>\*,a</sup> Lei Ren,<sup>a</sup> and Zhiwei Chen<sup>\*,b</sup>

<sup>a</sup>Key Laboratory of Biomedical Engineering of Fujian Province University/Research Center of Biomedical Engineering Technology of Xiamen, Department of Biomaterials, College of Materials, Xiamen University, Xiamen 361005, P. R. China, <sup>b</sup>Department of Electronic Science, Fujian Provincial Key Laboratory of Plasma and Magnetic Resonance Research, Xiamen University, Xiamen 361005, P. R. China, and <sup>c</sup>Department of Materials Science and Engineering, College of Materials, Xiamen University, Xiamen 361005, P. R. China.

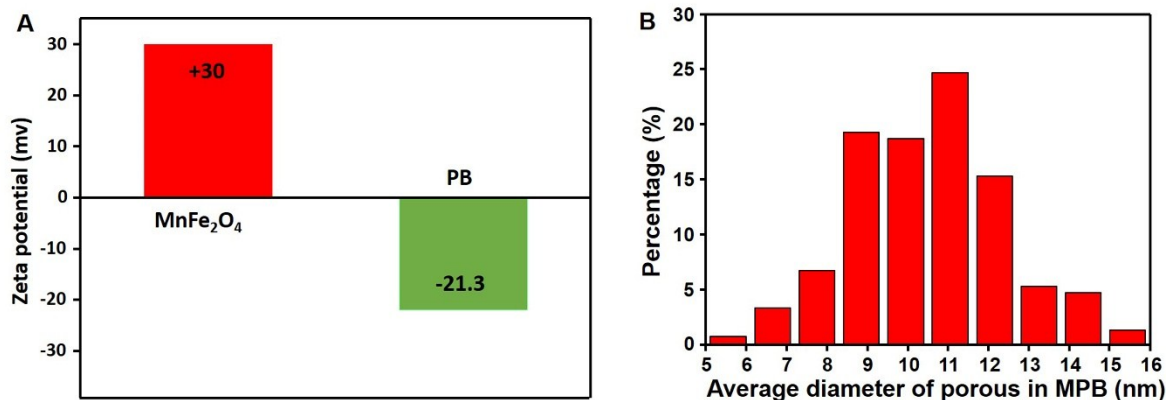

**Fig. S1** (A) The zeta potentials of MnFe<sub>2</sub>O<sub>4</sub> and PB in water. (B) The average diameter of porous in MPB NPs was measured in SEM images by Nano Measurer.

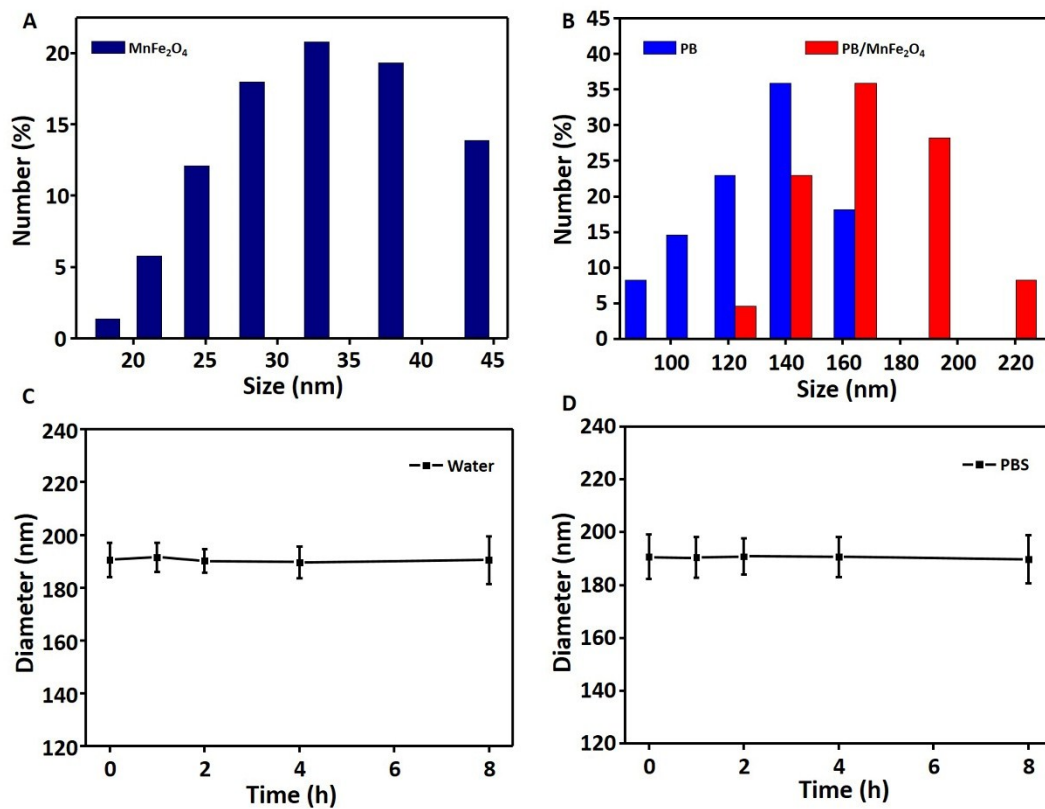

**Fig. S2** Hydrodynamic particle size of the MnFe<sub>2</sub>O<sub>4</sub> (A), PB and MPB (B) NPs in water; The diameter of MPB NPs in water (C) and PBS (D) at different time intervals.

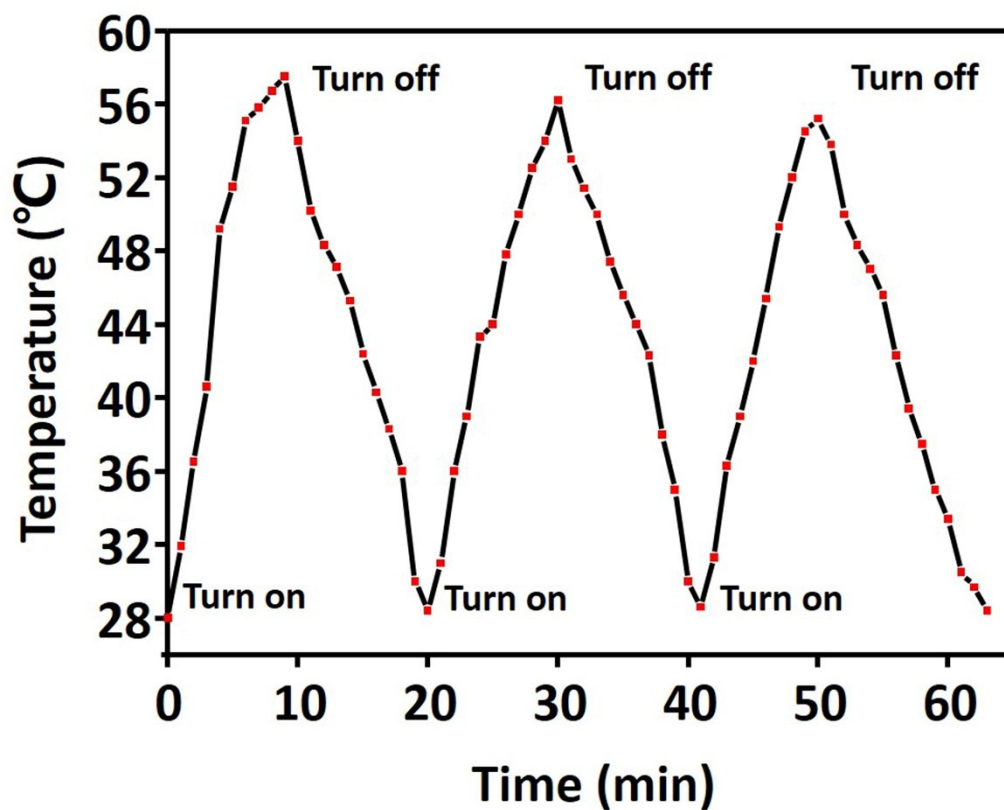

Fig. S3 Temperature variations of the MPB NPs under irradiation of an 808 nm laser ( $1.0 \text{ W cm}^{-2}$ ) and AC magnetic field (20A) synergistically for three cycles.

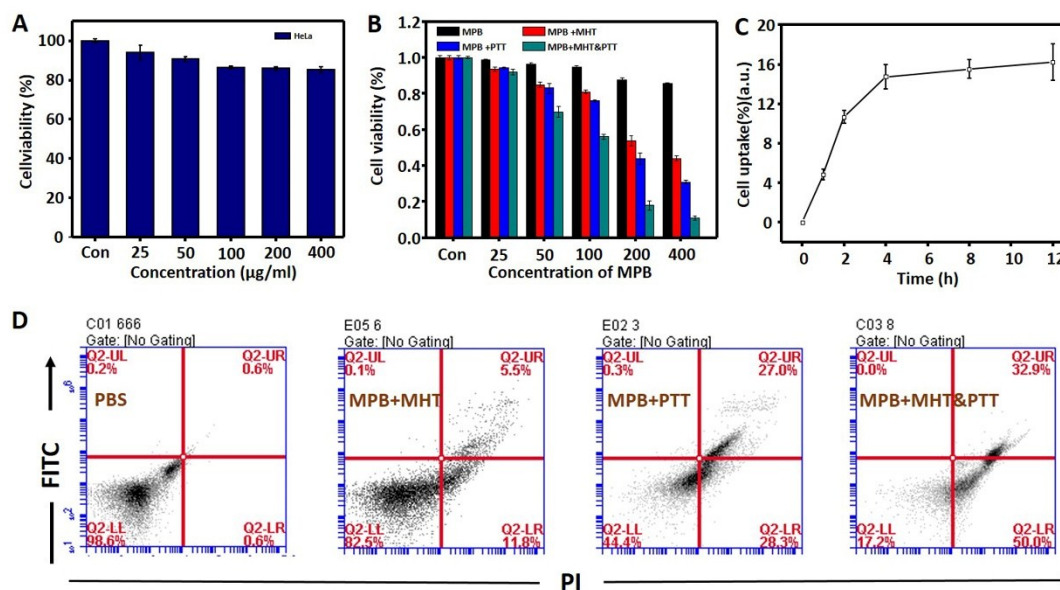

Fig. S4 *In vitro* experiments. (A) *In vitro* cytotoxicity of MPB NPs against HeLa after 24 h incubation. (B)

Cell viability of HeLa cells incubated with MPB, MPB+PTT, MPB+MHT and MPB+MHT&PTT. (C) Cellular uptake of MPB NPs at different time intervals with HeLa cells. (D) Flow cytometry analysis the toxicities of PBS, MPB+MHT, MPB+PTT and MPB+MHT&PTT with HeLa cells.

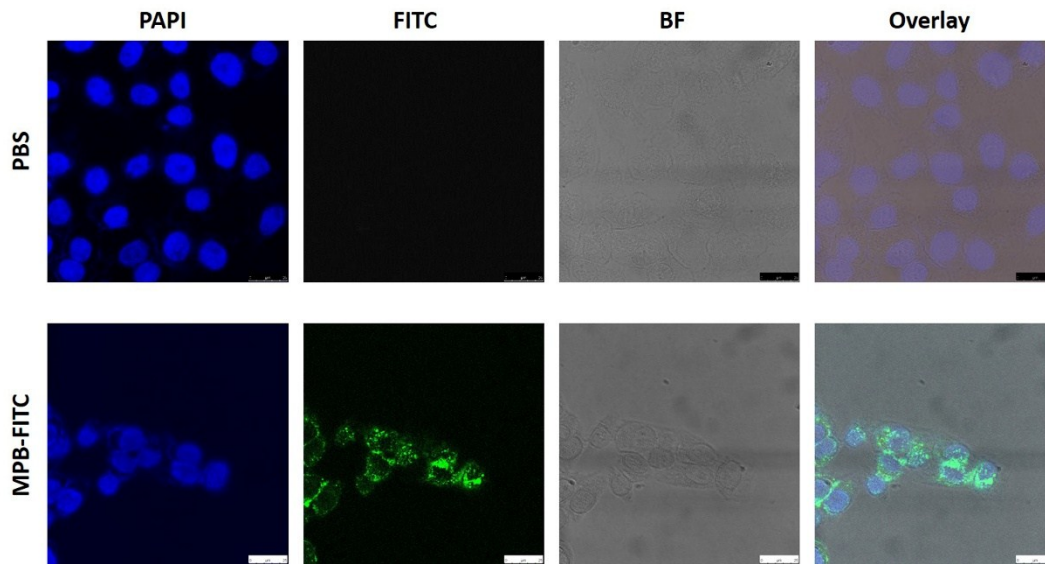

**Fig. S5** CLSM images of HeLa cells incubated with PBS and MPB-FITC for 4h. The cells were stained by DAPI (blue) and FITC was green.
